# Supplementary material for: MOF-derived porous Ni2P nanosheets as novel bifunctional electrocatalysts for the hydrogen and oxygen evolution reactions
Source: Royal Society of Chemistry journal article supplement (doi:10.1039/c8ta06491a), 2018-01-01
Supplement: c8ta06491a1.pdf [file c8ta06491a1.pdf]

*Electronic Supplementary Information for*

**MOF-Derived Porous Ni<sub>2</sub>P Nanosheets as Novel Bifunctional Electrocatalysts for  
Hydrogen and Oxygen Evolution Reaction**

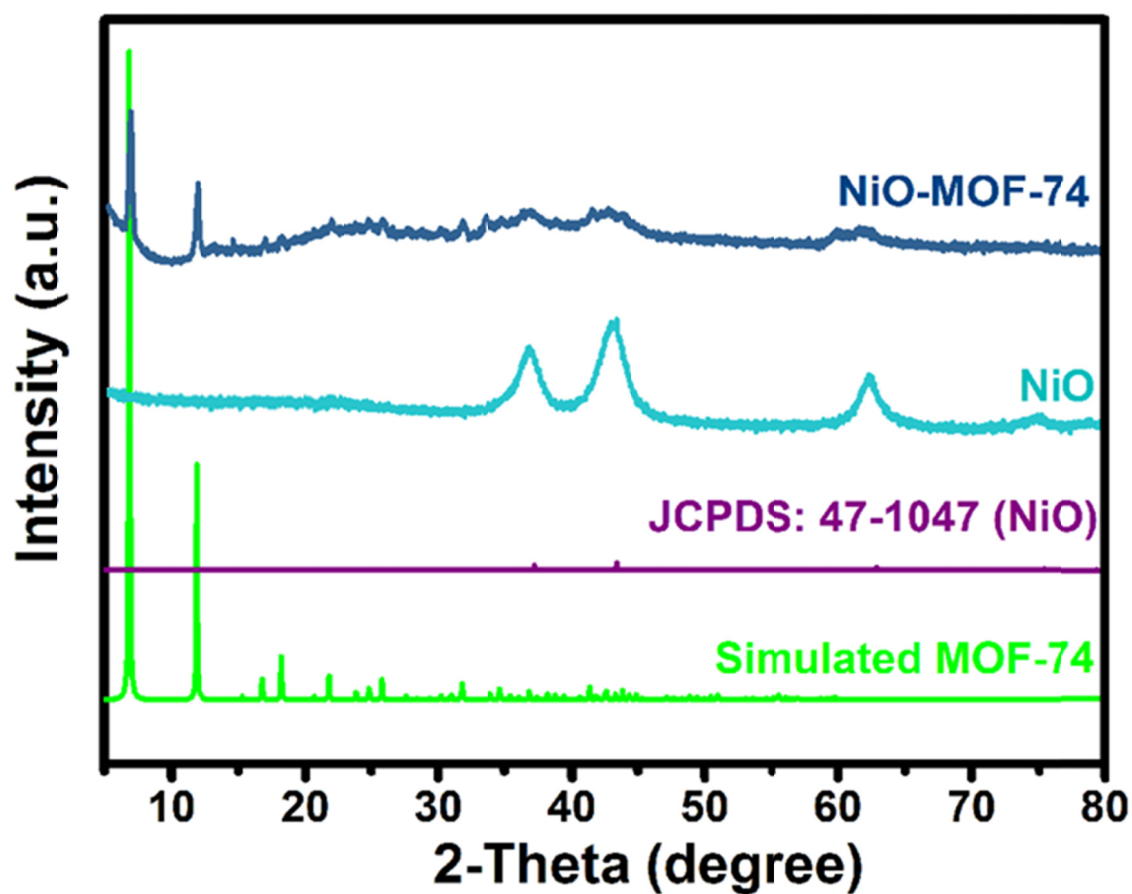

Fig. S1 XRD patterns of NiO and NiO-MOF-74 nanosheets.

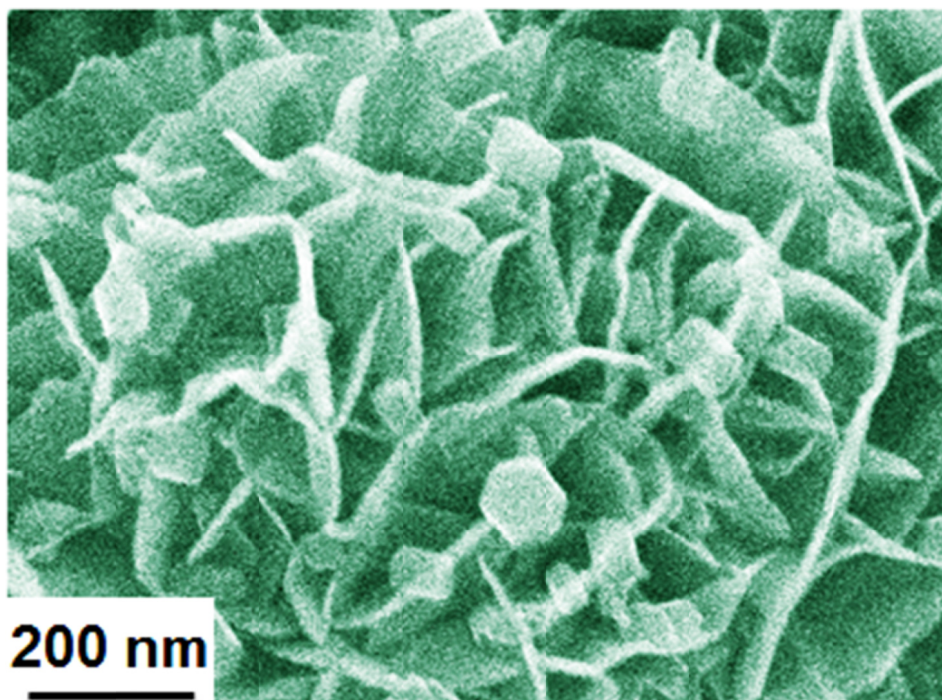

Fig. S2 SEM image of NiO-MOF-74 nanosheets.

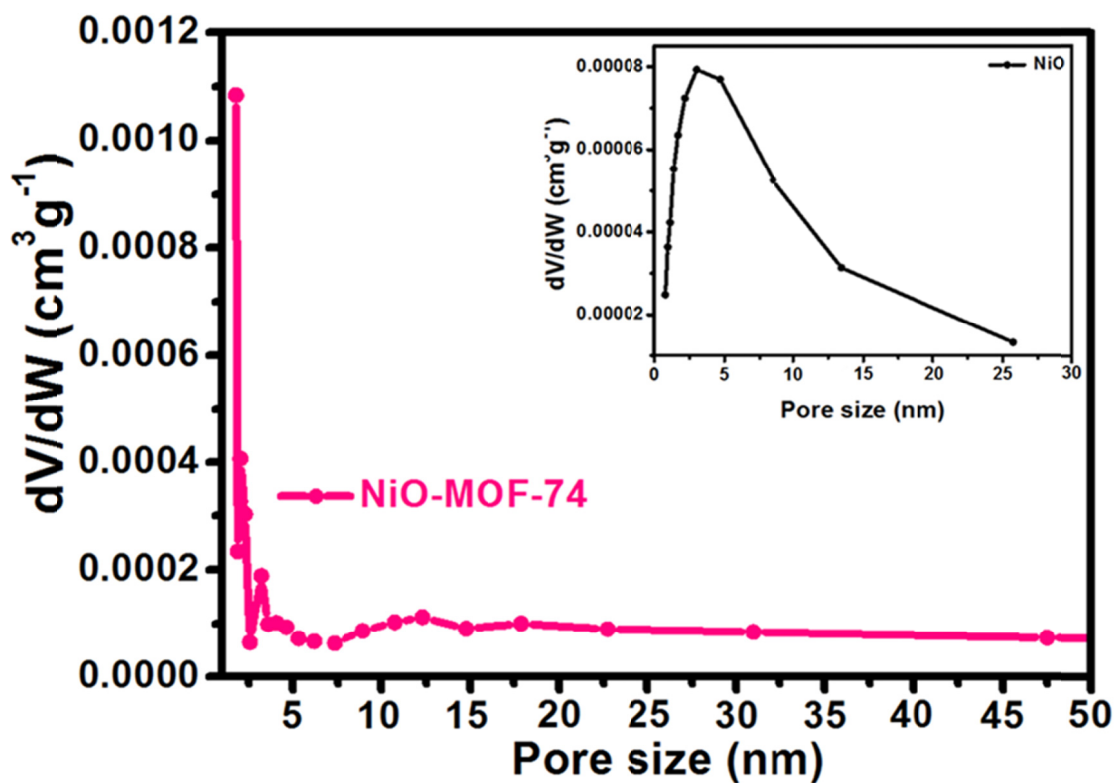

Fig. S3 Pore size distribution of NiO and NiO-MOF-74 nanosheets.

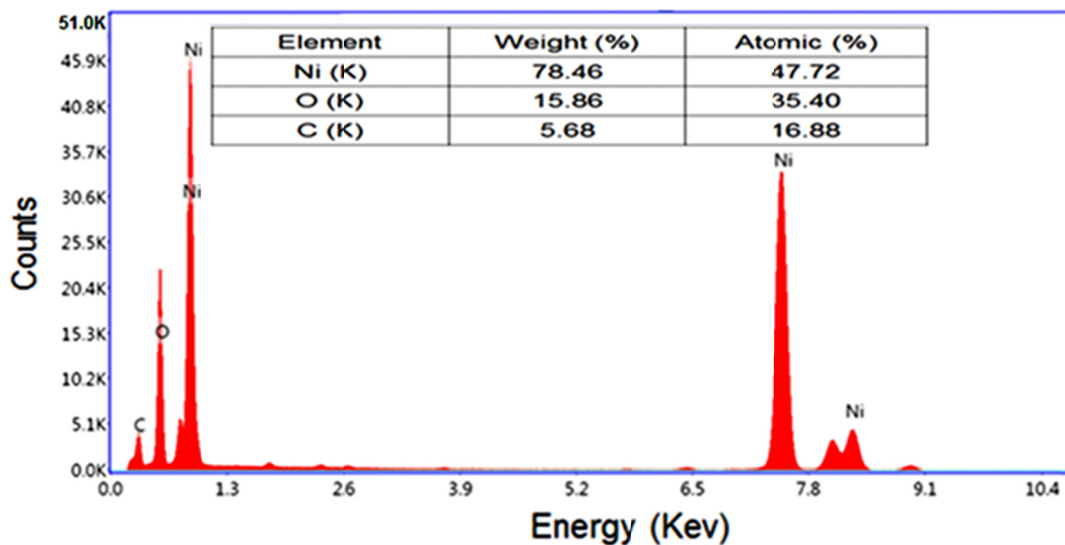

Fig. S4 TEM-EDS spectrum of the NiO-MOF-74.

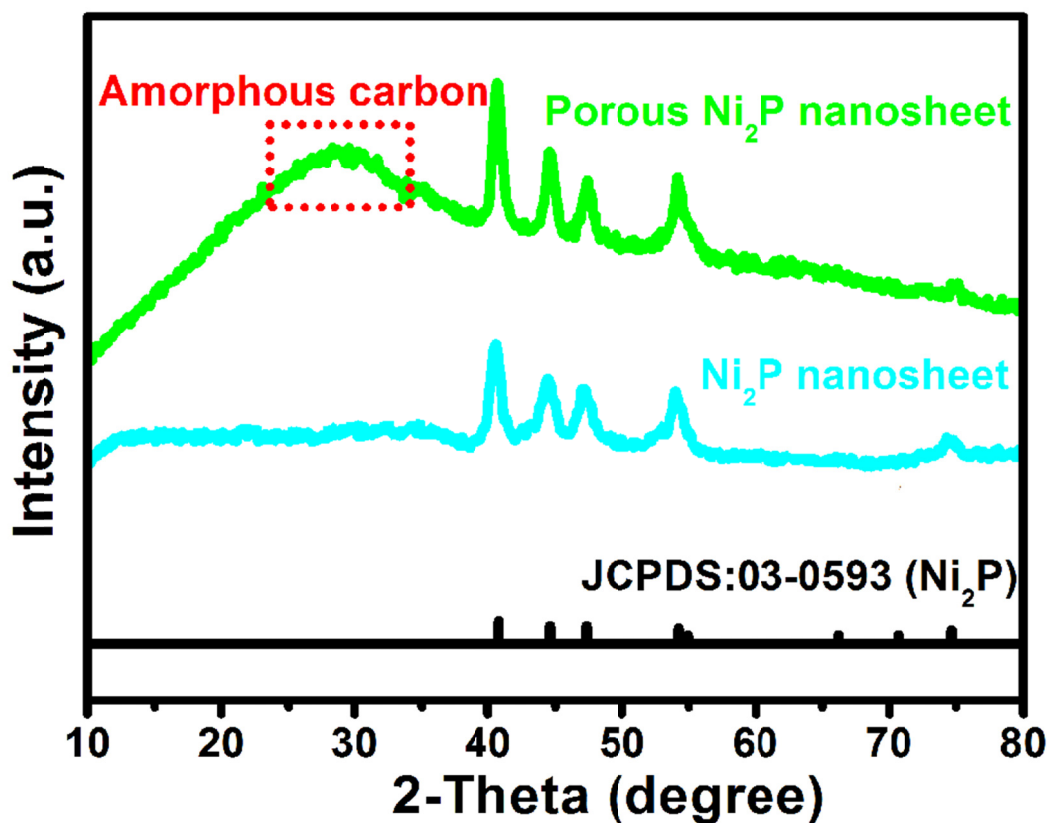

Fig. S5 XRD patterns of Ni<sub>2</sub>P and porous Ni<sub>2</sub>P nanosheets.

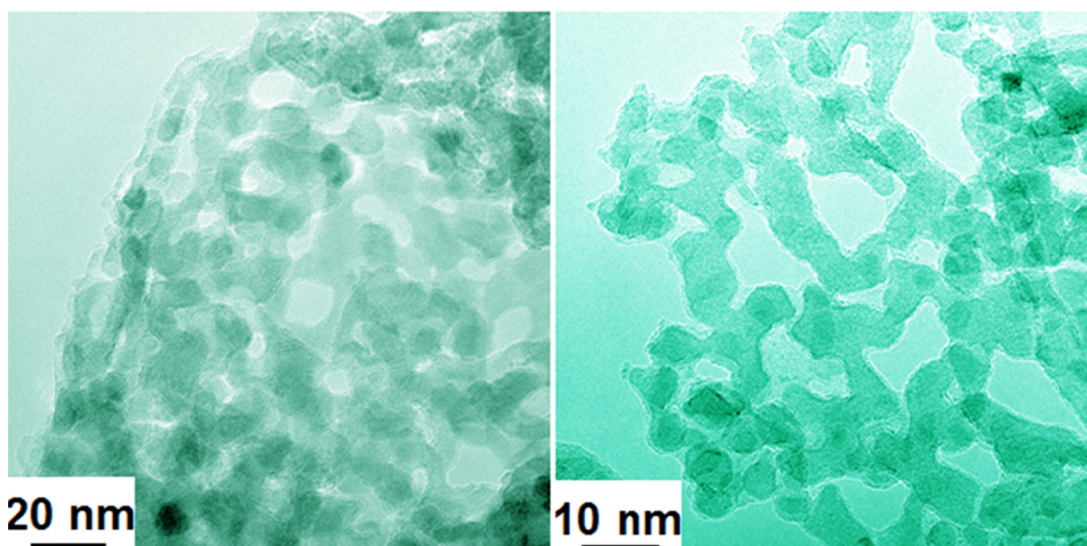

Fig. S6 High-magnified TEM images of porous Ni<sub>2</sub>P nanosheets.

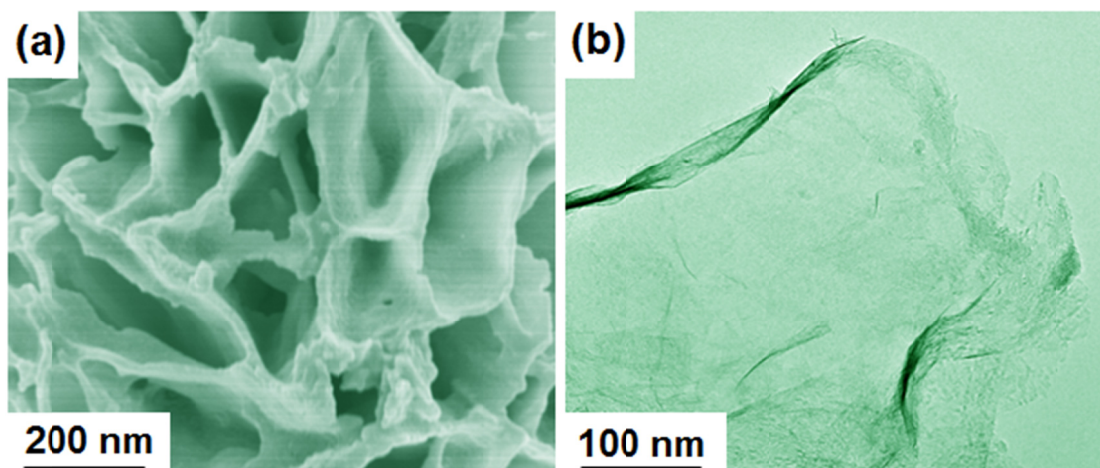

Fig. S7 (a) SEM and (b) TEM images of Ni<sub>2</sub>P nanosheets.

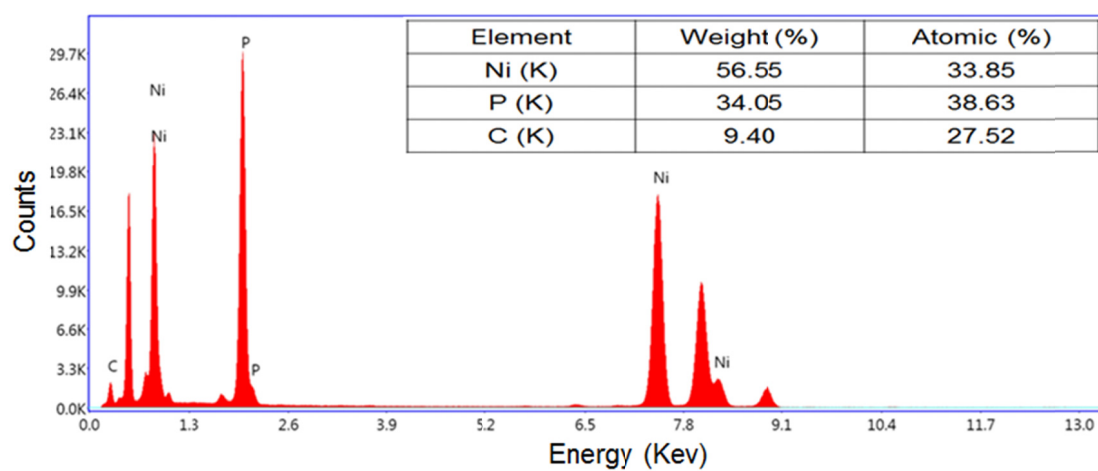

Fig. S8 TEM-EDS spectrum of the porous Ni<sub>2</sub>P nanosheets.

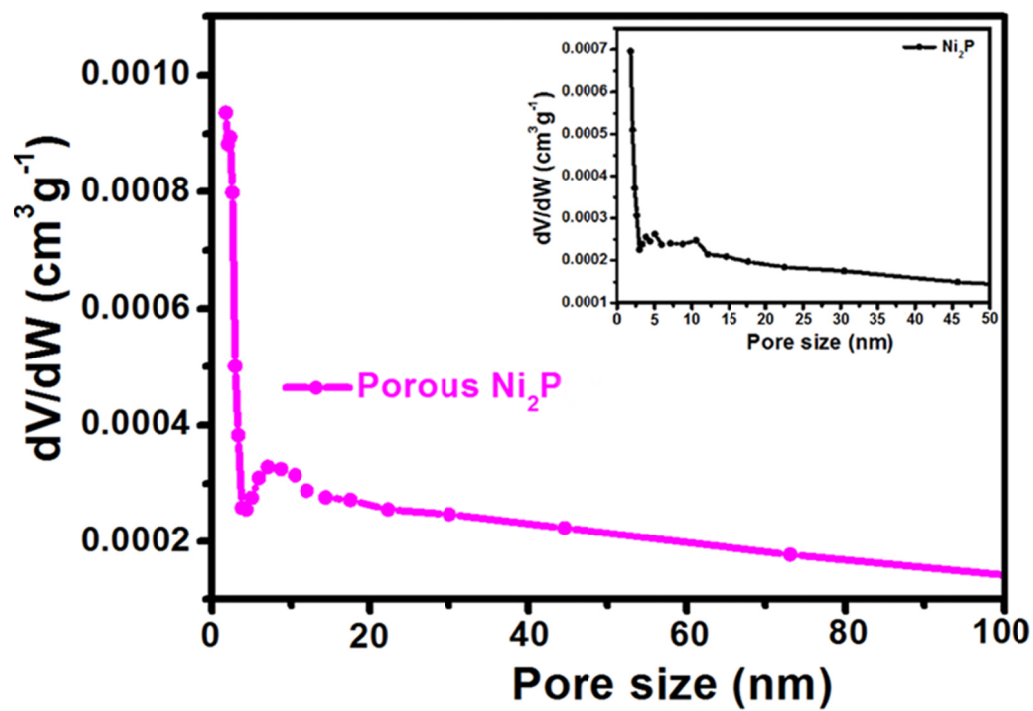

Fig. S9 Pore size distribution of the Ni<sub>2</sub>P and porous Ni<sub>2</sub>P nanosheets.

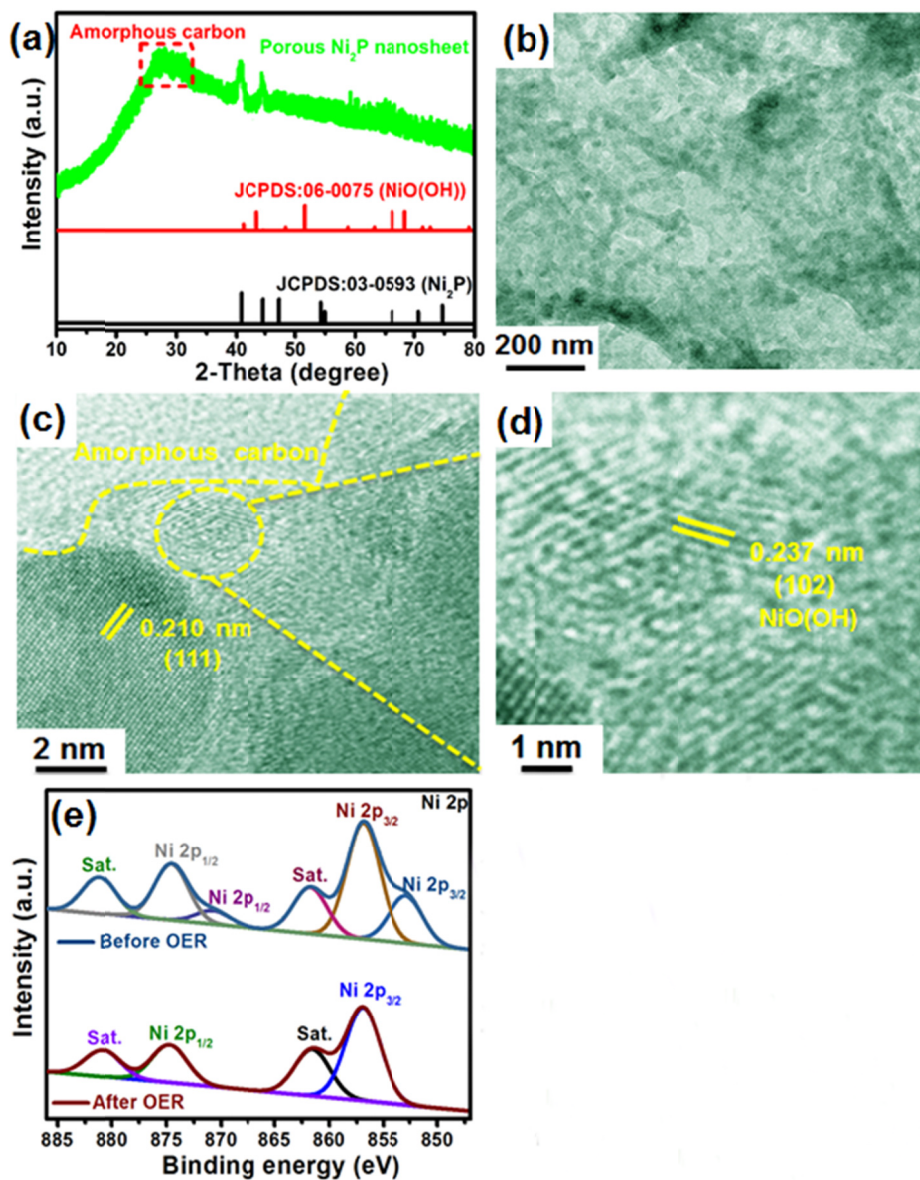

**Fig. S10** (a) XRD pattern, (b) TEM image and (c,d) HRTEM images of porous Ni<sub>2</sub>P nanosheets after 10 h OER stability test. (e) XPS signals of Ni 2p for the porous Ni<sub>2</sub>P nanosheets after 10 h OER stability test.

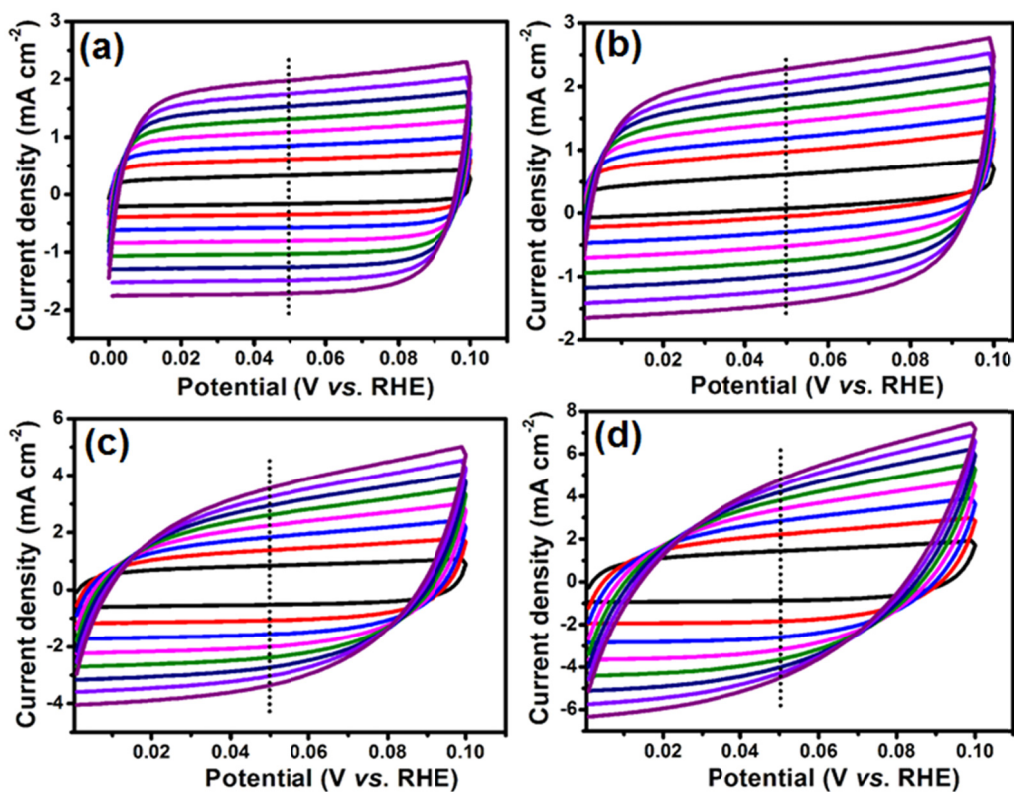

Fig. S11 Voltammograms of the (a) NiO, (b) NiO-MOF-74, (c) pristine Ni<sub>2</sub>P and (d) porous Ni<sub>2</sub>P nanosheets electrocatalysts at various scan rates (20-160 mV s<sup>-1</sup>).

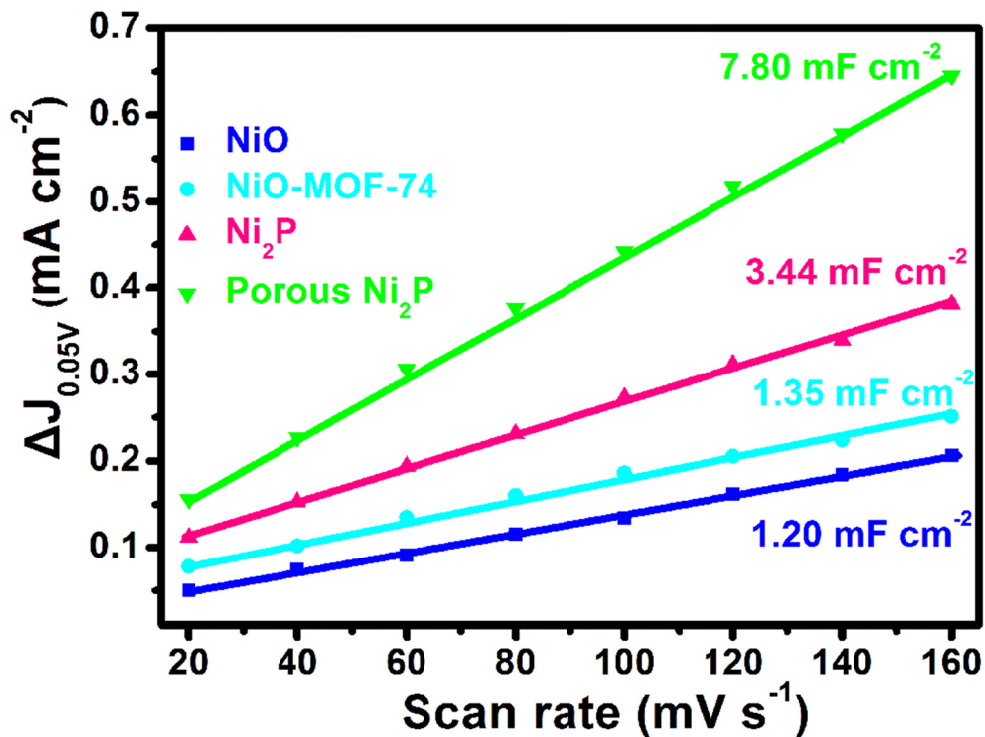

Fig. S12 Capacitive current at 0.05 V (vs RHE) as a function of scan rate for NiO, NiO-MOF-74, pristine Ni<sub>2</sub>P and porous Ni<sub>2</sub>P nanosheets.

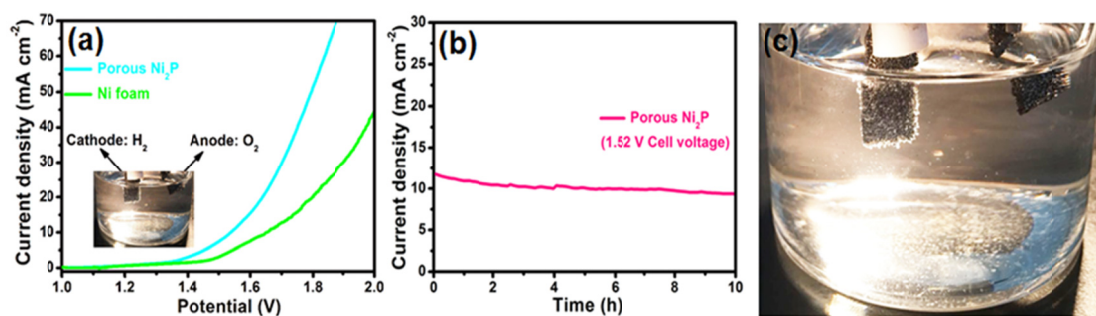

**Fig. S13** (a) LSV curves of overall water splitting in a two-electrode system. The inset is the digital photo of H<sub>2</sub> and O<sub>2</sub> bubbles. (b) The stability of water splitting at a cell voltage of 1.52 V for 10 h. (c) Enlarged digital photo of H<sub>2</sub> and O<sub>2</sub> bubbles.

Table S1 Summary of the HER and OER performance using Ni<sub>2</sub>P nanostructures as electrocatalysts.

| <b>catalyst</b>                                      | <b>Overpotential<br/>(10 mA cm<sup>-2</sup>)</b> | <b>Tafel Slope<br/>(mV dec<sup>-1</sup>)</b> | <b>Electrolyte</b>                                | <b>Reference</b>                                          |
|------------------------------------------------------|--------------------------------------------------|----------------------------------------------|---------------------------------------------------|-----------------------------------------------------------|
| <b>MOF derived porous Ni<sub>2</sub>P NS</b>         | <b>168 (HER)<br/>320 (OER)</b>                   | <b>63 (HER)<br/>105 (OER)</b>                | <b>1.0 M KOH<br/>1.0 M KOH</b>                    | <b>Our work</b>                                           |
| MOF derived Ni <sub>2</sub> P/CoP NP                 | 184 (HER)<br>360 (OER)                           | 67 (HER)<br>72 (OER)                         | 0.5 M H <sub>2</sub> SO <sub>4</sub><br>0.1 M KOH | <i>ACS Appl. Mater. Interfaces</i> 2017, <b>9</b> , 23222 |
| MOF derived Ni <sub>2</sub> P polyhedrons            | 310 (HER)                                        | 73 (HER)                                     | 0.5 M H <sub>2</sub> SO <sub>4</sub>              | <i>ACS Appl. Mater. Interfaces</i> 2017, <b>9</b> , 11642 |
| Ni-Fe-P porous Nanorods                              | 233 (HER)<br>256 (OER)                           | 101.2 (HER)<br>72.6 (OER)                    | 1.0 M KOH<br>1.0 M KOH                            | <i>J. Mater. Chem. A</i> 2017, <b>5</b> , 2496            |
| MOF derived Ni/Ni <sub>2</sub> P/Mo <sub>2</sub> C@C | 223 (HER)<br>368 (OER)                           | 66 (HER)<br>75 (OER)                         | 0.5 M H <sub>2</sub> SO <sub>4</sub><br>1.0 M KOH | <i>J. Mater. Chem. A</i> 2018, <b>6</b> , 5789            |
| Ni <sub>2</sub> P-CeO <sub>2</sub> nanosheet         | 131 (HER)                                        | 87 (HER)                                     | 1.0 M KOH                                         | <i>Inorg. Chem.</i> 2018, <b>57</b> , 548                 |
| NiS/Ni <sub>2</sub> P Heterostructure                | 158 (HER)<br>335 (OER)                           | 78.1 (HER)<br>101.1 (OER)                    | 0.5 M H <sub>2</sub> SO <sub>4</sub><br>1.0 M KOH | <i>ACS Appl. Mater. Interfaces</i> 2018, <b>10</b> , 4689 |
| MOF derived Ni <sub>2</sub> P nanoparticle           | 380 (HER)                                        | 270 (HER)                                    | 0.5 M H <sub>2</sub> SO <sub>4</sub>              | <i>RSC Adv.</i> 2015, <b>5</b> , 10290                    |



|                                         |                        |                           |                                      |                                                   |
|-----------------------------------------|------------------------|---------------------------|--------------------------------------|---------------------------------------------------|
| Porous Ni <sub>2</sub> P Superstructure | 221 (HER)<br>400 (OER) | 91 (HER)<br>132 (OER)     | 1.0 M KOH<br>1.0 M KOH               | <i>ACS Catal.</i> 2016,<br><b>6</b> , 714         |
| Ni <sub>2</sub> P nanosheet             | 185 (HER)              | 138 (HER)                 | 0.5 M H <sub>2</sub> SO <sub>4</sub> | <i>Chem. Commun.</i> ,<br>2017, <b>53</b> , 11048 |
| Ni <sub>2</sub> P Hollow Microsphere    | 214 (HER)<br>359 (OER) | 125.4 (HER)<br>71.7 (OER) | 1.0 M KOH<br>1.0 M KOH               | <i>Chem. Mater.</i><br>2017, <b>29</b> , 8539     |

---
